# Supplementary material for: Enhanced water retention and stable dynamic water behavior of sulfonated poly(ether ether ketone) membranes under low humidity by incorporating humidity responsive double-shelled hollow spheres
Source: Royal Society of Chemistry journal article supplement (doi:10.1039/c3ta11620d), 2013-01-01
Supplement: c3ta11620d.pdf [file c3ta11620d.pdf]

# **Enhanced Water Retention and Stable Dynamic Water Behaviour of Sulfonated Poly(ether ether ketone) Membranes (SPEEK) under Low Humidity by Incorporating Humidity Responsive Double-shelled Hollow Spheres**

Enwei Yan<sup>a)</sup>, Jingtao Wang<sup>b)</sup>, Hailiang Feng<sup>a)</sup>, Lingli Nie<sup>b)</sup>, Tao Xu<sup>a)</sup>,  
Zhongyi Jiang<sup>b)</sup>, Xinlin Yang<sup>a)\*</sup> and Xu Zhang<sup>a)</sup>

a) Key Laboratory of Functional Polymer Materials, Ministry of Education, Institute of Polymer Chemistry, Nankai University, Tianjin 300071, China

b) Key Laboratory for Green Chemical Technology, Ministry of Education, School of Chemical Engineering and Technology, Tianjin University, Tianjin 300072, China

---

\* Corresponding author: Tel: +86-22-23502023, Fax: +86-22-23503510, E-mail: [xlYang88@nankai.edu.cn](mailto:xlYang88@nankai.edu.cn)

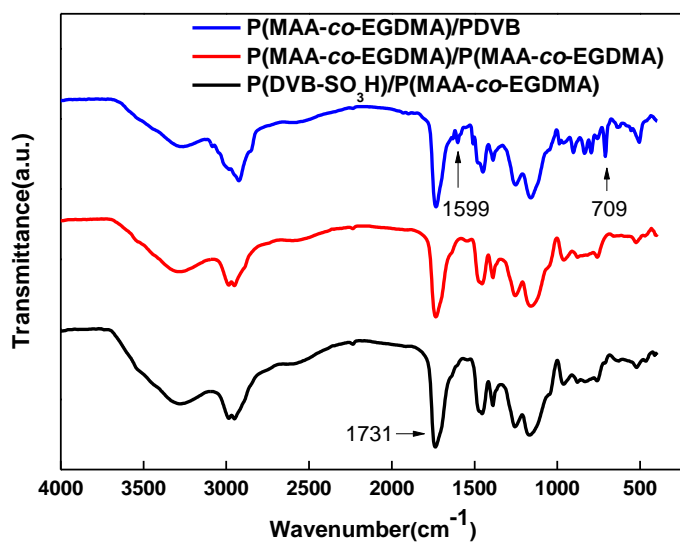

(A)

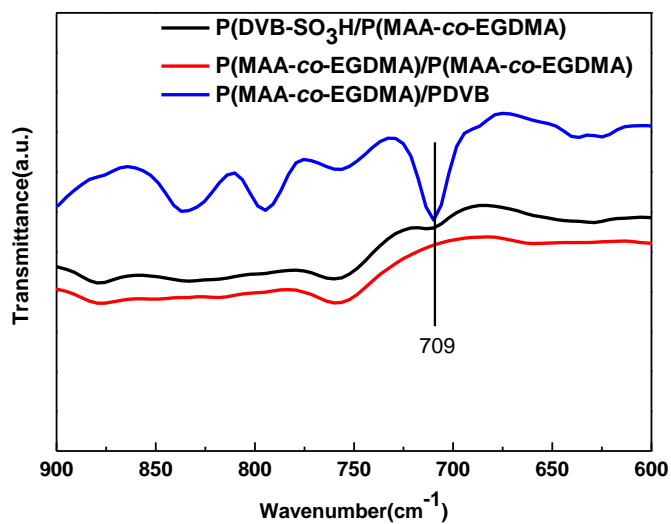

(B)

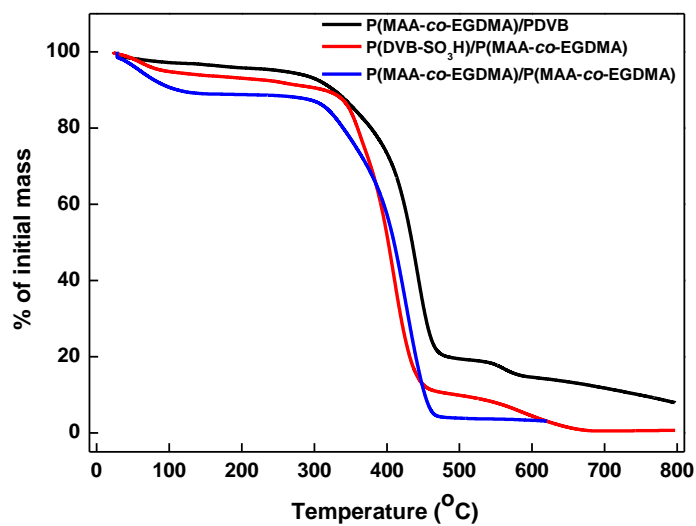

(C)

Fig. S1 Fig. 2 FT-IR of DSHSs (A,B) and TGA curves of DSHSs

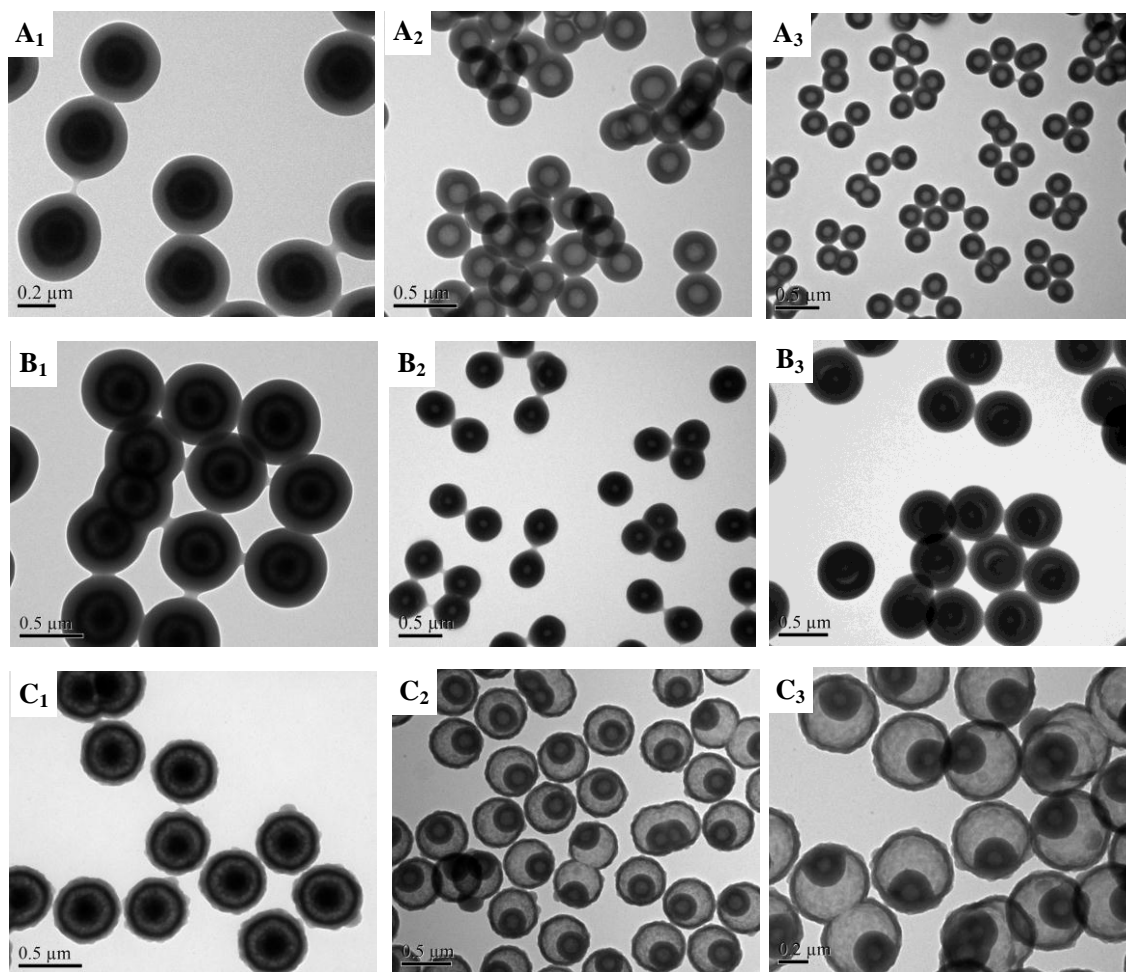

Fig. S2 TEM graphs of spheres: A<sub>1</sub>: SiO<sub>2</sub>/P(DVB-SO<sub>3</sub>H)/SiO<sub>2</sub>/P(MAA-*co*-EGDMA) tetra-layer spheres; A<sub>2</sub>, A<sub>3</sub>: P(DVB-SO<sub>3</sub>H)/P(MAA-*co*-EGDMA) DSHSs; B<sub>1</sub>: SiO<sub>2</sub>/P(MAA-*co*-EGDMA)/SiO<sub>2</sub>/P(MAA-*co*-EGDMA) tetra-layer spheres; B<sub>2</sub>, B<sub>3</sub>: P(MAA-*co*-EGDMA)/P(MAA-*co*-EGDMA) DSHSs; C<sub>1</sub>: SiO<sub>2</sub>/P(MAA-*co*-EGDMA)/SiO<sub>2</sub>/PDVB tetra-layer spheres; C<sub>2</sub>, C<sub>3</sub>: P(MAA-*co*-EGDMA)/PDVB DSHSs.

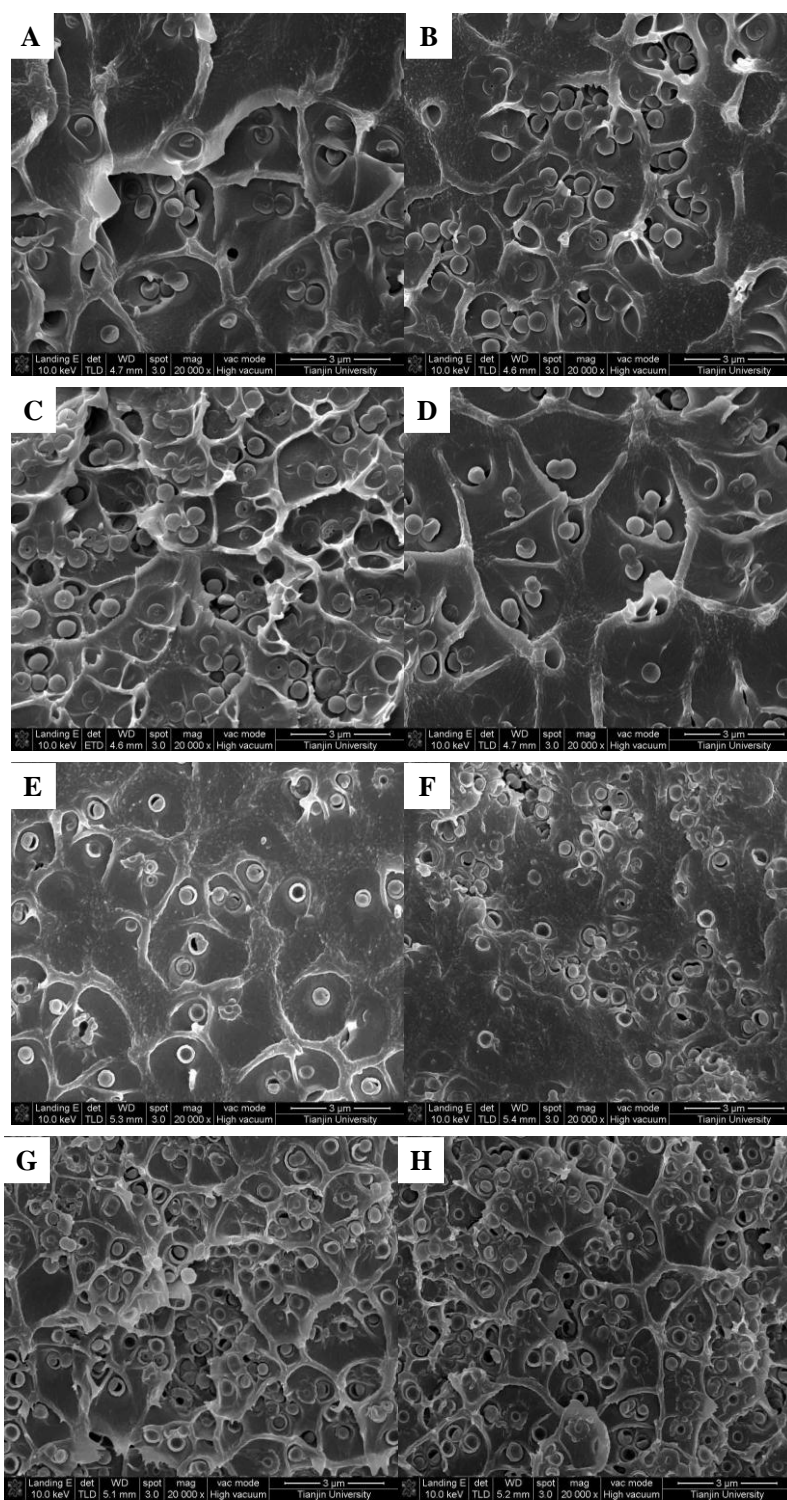

Fig. S3 FESEM of hybrid membranes

A: SPEEK/MM-2.5, B: SPEEK/MM-5, C: SPEEK/MM-10, D: SPEEK/MM-15  
E: SPEEK/MD-2.5, F: SPEEK/MD-5, G: SPEEK/MD-10, H: SPEEK/MD-15

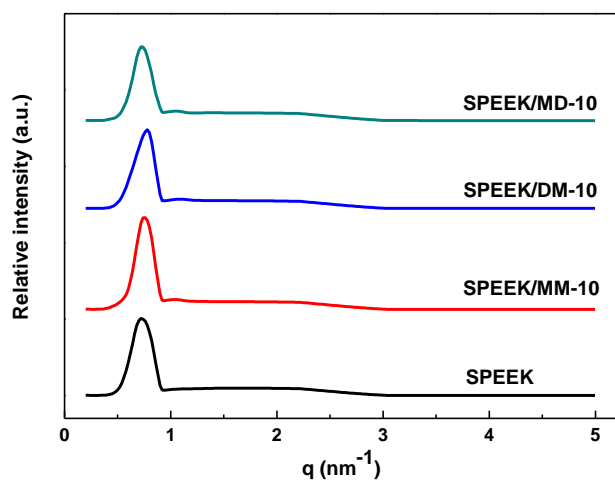

(A)

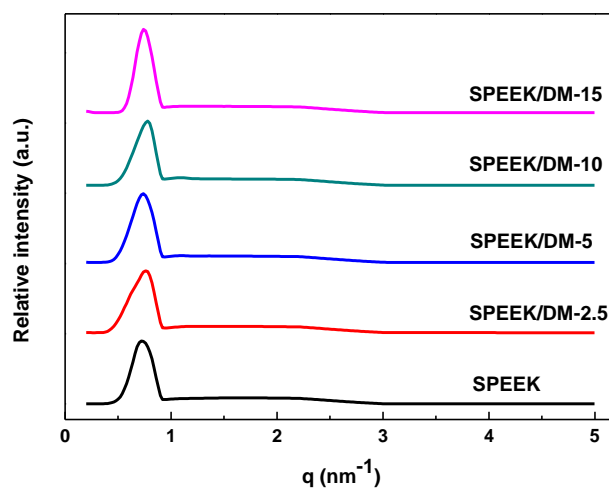

(B)

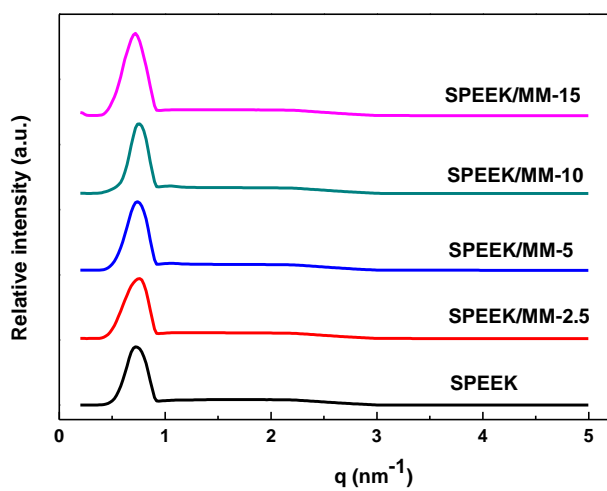

(C)

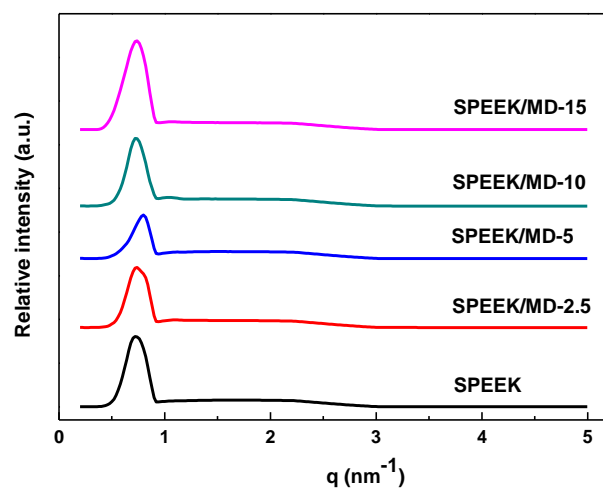

(D)

Fig. S4 SAXS curves of hybrid membranes (A), SPEEK/DM membranes (B),  
SPEEK/MM membranes (C), SPEEK/MD membranes (D)

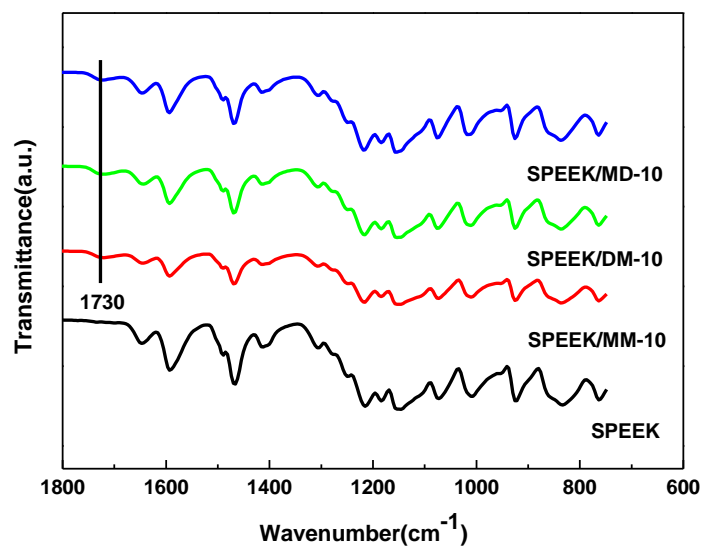

(A)

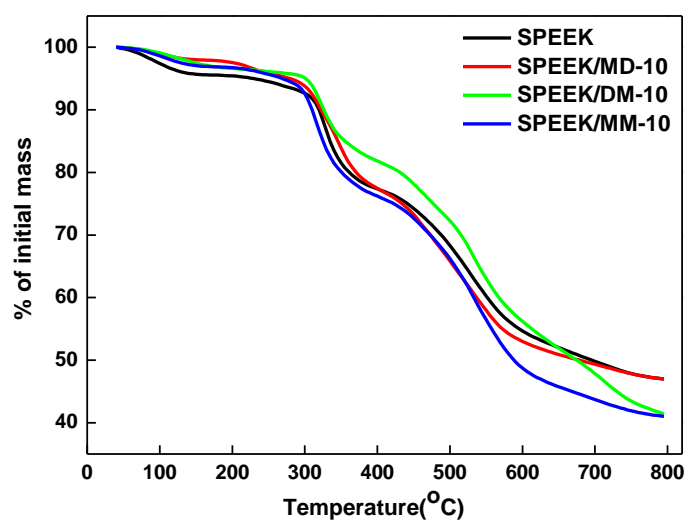

(B)

Fig. S5 FT-IR (A) and TGA (B) curves of membranes

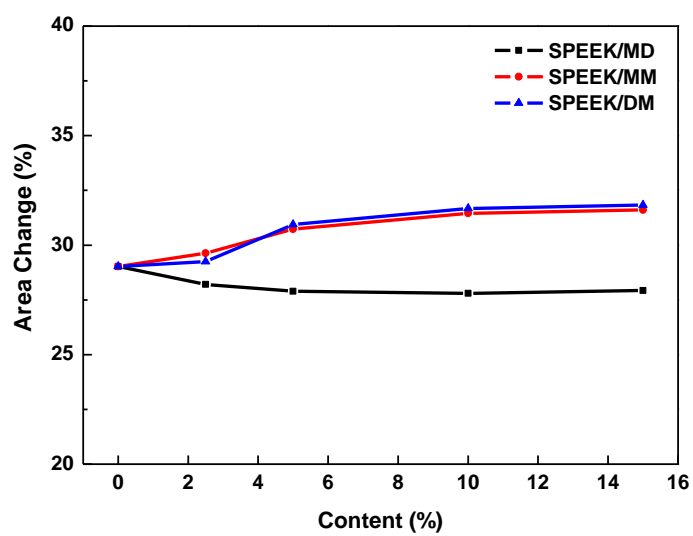

Fig. S6 Dimension change of membranes as the function of DSHSs content
